# Supplementary material for: An origin of excess vibrational entropies at grain boundaries in Al, Si and MgO: a first-principles analysis with lattice dynamics
Source: Royal Society of Chemistry journal article supplement (doi:10.1039/d1cp00790d), 2021-01-01
Supplement: d1cp00790d1.pdf [file d1cp00790d1.pdf]

## An origin of excess vibrational entropies at grain boundaries in Al, Si and MgO: A first-principles analysis with lattice dynamics

T. Yokoi<sup>1</sup>, K. Ikawa<sup>1</sup>, A. Nakamura<sup>1</sup>, K. Matsunaga<sup>1,2</sup>

<sup>1</sup>Department of Materials Physics, Nagoya University, Nagoya 464-8603, Japan

<sup>2</sup>Nanostructures Research Laboratory, Japan Fine Ceramics Center, Nagoya, 456-8587, Japan

### S1. Grain boundary energy and excess volume at 0 K

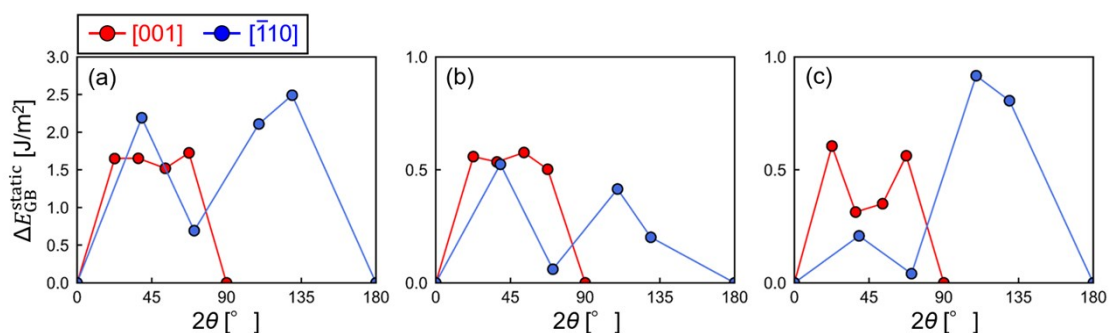

Fig. S1. Zero-temperature grain boundary (GB) energy ( $\Delta E_{GB}^{static}$ ) as a function of misorientation angle of two grains ( $2\theta$ ) for (a) MgO, (b) Al and (c) Si. The red and blue lines correspond to the GBs with the [001] and  $[\bar{1}10]$  tilt axes, respectively.  $\Delta E_{GB}^{static}$  was calculated from DFT total energies.

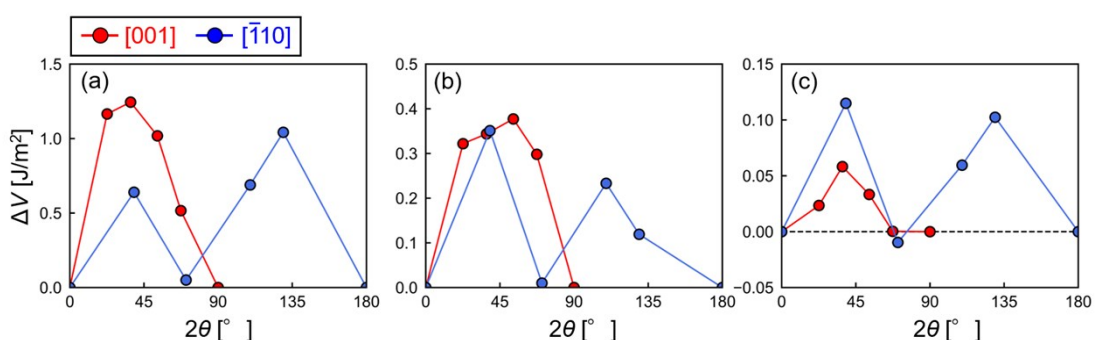

Fig. S2. Excess volume ( $\Delta V$ ) as a function of misorientation angle of two grains ( $2\theta$ ) for (a) MgO, (b) Al and (c) Si. The red and blue lines correspond to the GBs with the [001] and  $[\bar{1}10]$  tilt axes, respectively.  $\Delta V$  was calculated using the lowest-energy structures at 0 K.

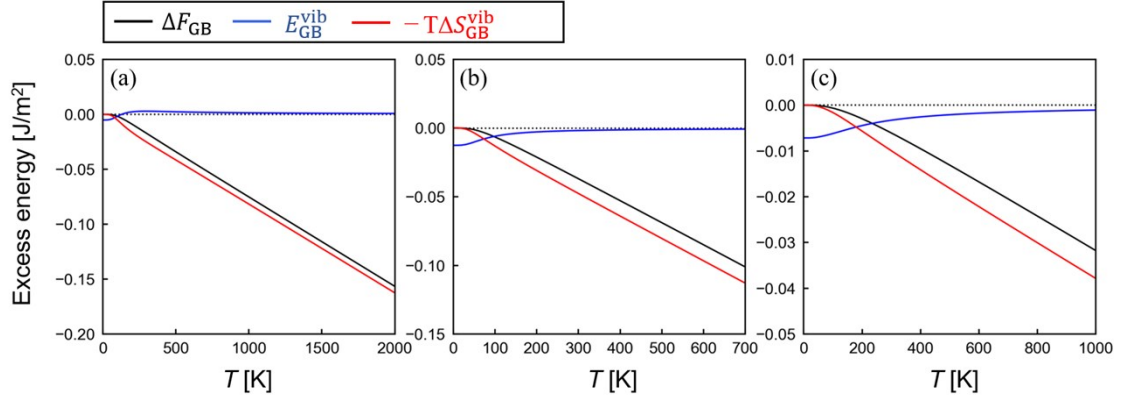

Fig. S3 Temperature dependence of GB free energy ( $\Delta F_{GB}$ ), excess internal energy ( $\Delta E_{GB}^{vib}$ ) and excess vibrational entropy multiplied by temperature ( $T\Delta S_{GB}^{vib}$ ) for the  $\Sigma 5(310)$  GB for (a) MgO, (b) Al and (c) Si.

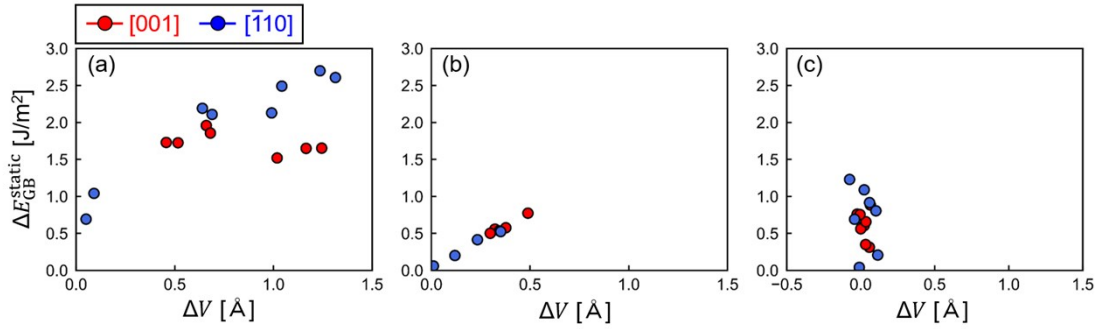

Table S1. Zero-temperature grain boundary (GB) energy ( $\Delta E_{GB}^{static}$ ) for the metastable structures used for lattice dynamics calculations. The value in the parentheses is the increase in  $\Delta E_{GB}^{static}$  from that of the lowest-energy structure.

| Substance | Grain boundary         | $\Delta E_{GB}^{static}$ [J/m <sup>2</sup> ] |
|-----------|------------------------|----------------------------------------------|
| MgO       | $\Sigma 13(510)/[001]$ | 1.96 (0.31)                                  |
|           | $\Sigma 5(310)/[001]$  | 1.86 (0.20)                                  |
|           | $\Sigma 13(320)/[001]$ | 1.73 (0.004)                                 |

|    |                              |             |
|----|------------------------------|-------------|
|    | $\Sigma 9(221)/[\bar{1}10]$  | 2.70 (0.51) |
|    | $\Sigma 3(111)/[\bar{1}10]$  | 1.04 (0.35) |
|    | $\Sigma 3(112)/[\bar{1}10]$  | 2.13 (0.02) |
|    | $\Sigma 11(113)/[\bar{1}10]$ | 2.61 (0.12) |
| Al | $\Sigma 5(310)/[001]$        | 0.77 (0.24) |
|    | $\Sigma 13(510)/[001]$       | 0.66 (0.05) |
|    | $\Sigma 5(310)/[001]$        | 0.76 (0.45) |
|    | $\Sigma 5(210)/[001]$        | 0.88 (0.53) |
| Si | $\Sigma 13(320)/[001]$       | 0.76 (0.19) |
|    | $\Sigma 9(221)/[\bar{1}10]$  | 0.69 (0.48) |
|    | $\Sigma 3(112)/[\bar{1}10]$  | 1.23 (0.31) |
|    | $\Sigma 11(113)/[\bar{1}10]$ | 1.09 (0.28) |
